# Supplementary material for: Transcriptional Profiling of Early Defense Response to White Pine Blister Rust Infection in Pinus albicaulis (Whitebark Pine)
Source: MDPI journal article supplement (doi:10.3390/genes15050602), 2024-05-09
Supplement: s1 [file s1]

## Supplementary materials

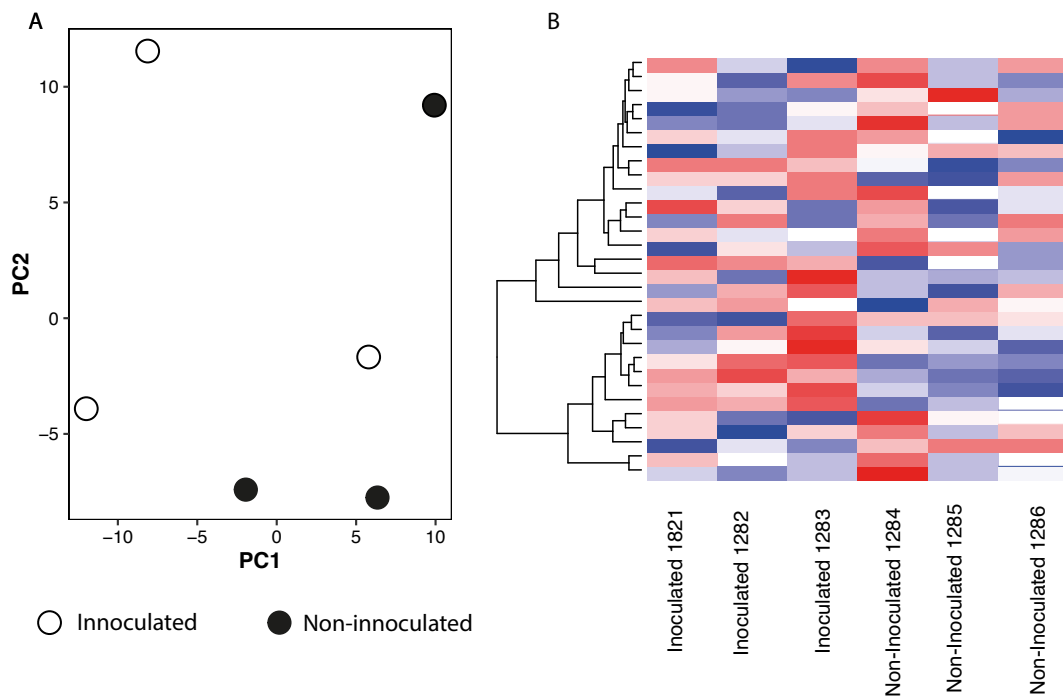

**Figure S1.** Heterogeneity expression patterns in *P. albicaulis*, comparing inoculated vs. non-inoculated individuals. A. PCA constructed by 599 differentially expressed genes. B. Heatmap clustering 30 most DE genes.

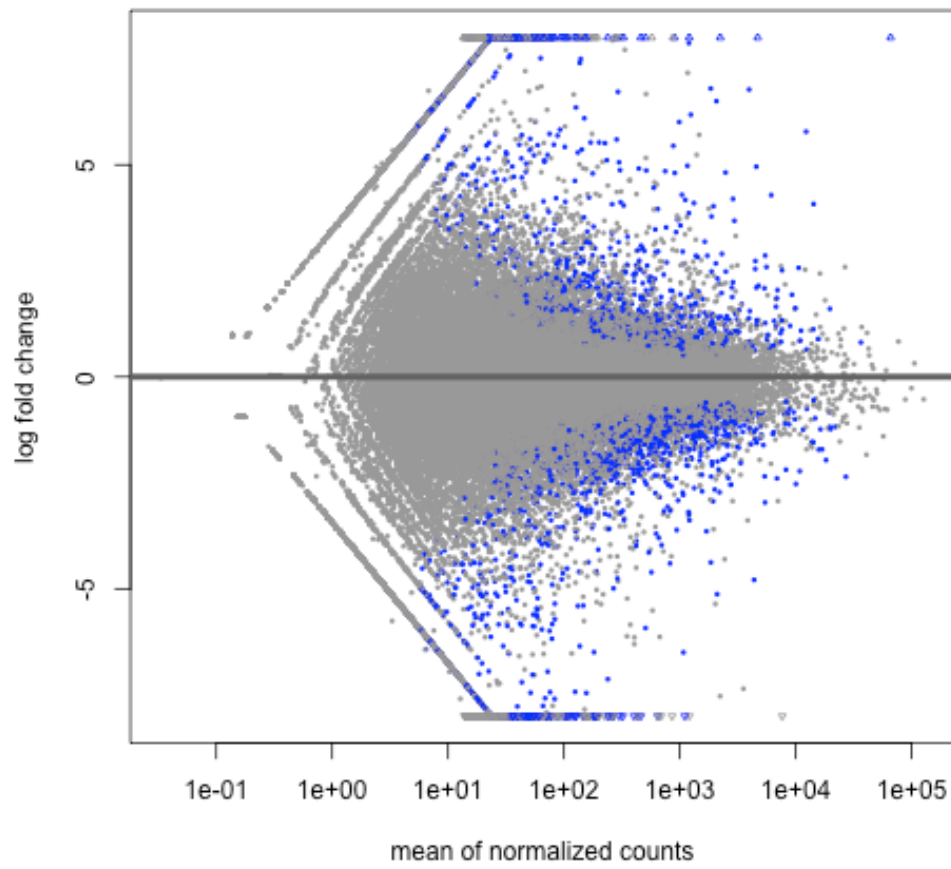

**Figure S2.** Volcano plot for differentially expressed genes of *P. albicaulis*, obtained by comparing inoculated vs. non-inoculated individuals.

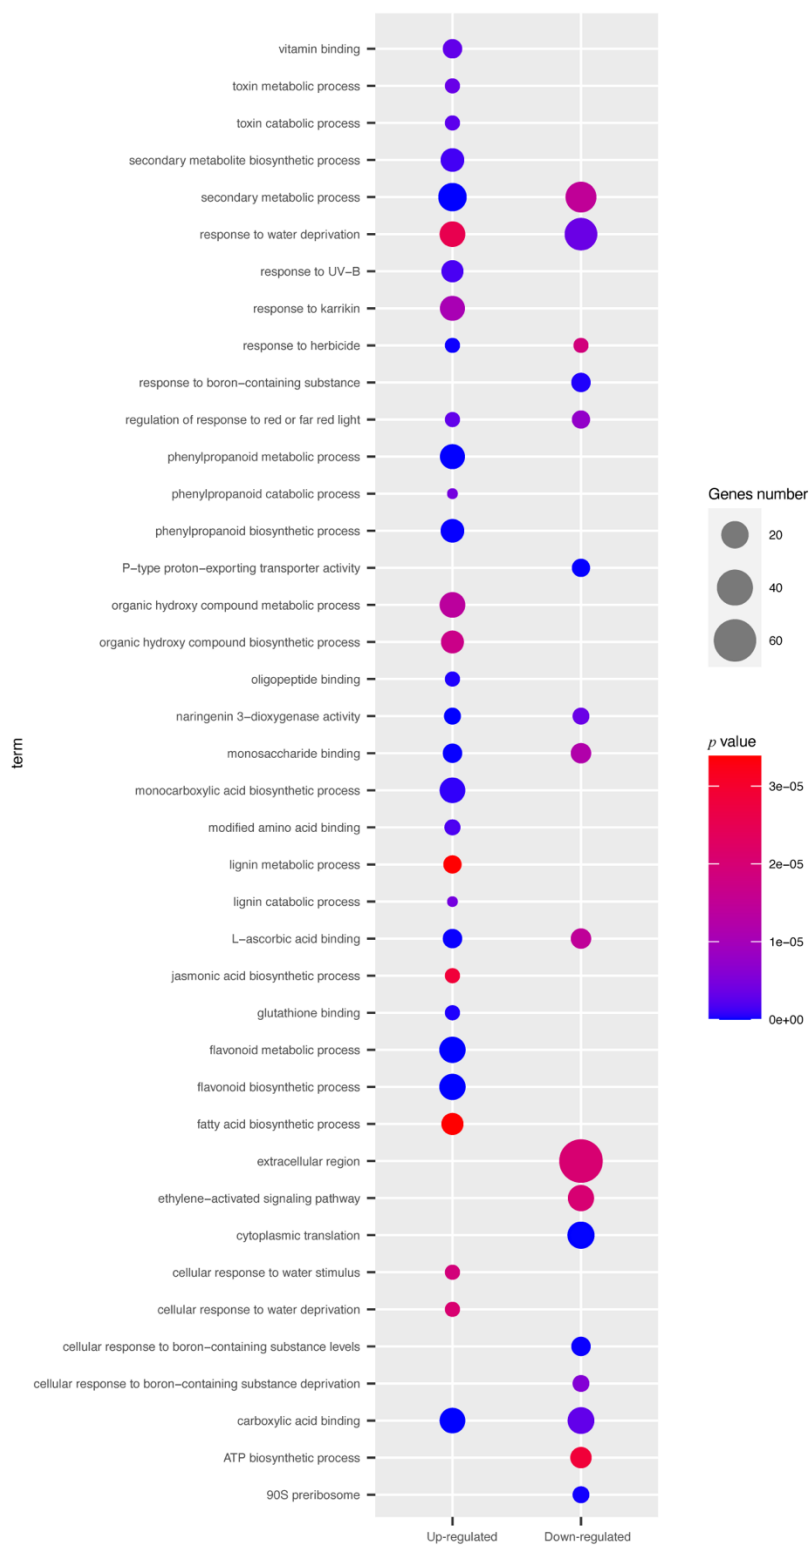

**Figure S3.** Molecular function gene ontology (GO) enrichment analysis. Enriched GO terms of up-( $3e^{-5}$ ) and down-(0) regulated genes in *P. albicaulis*.

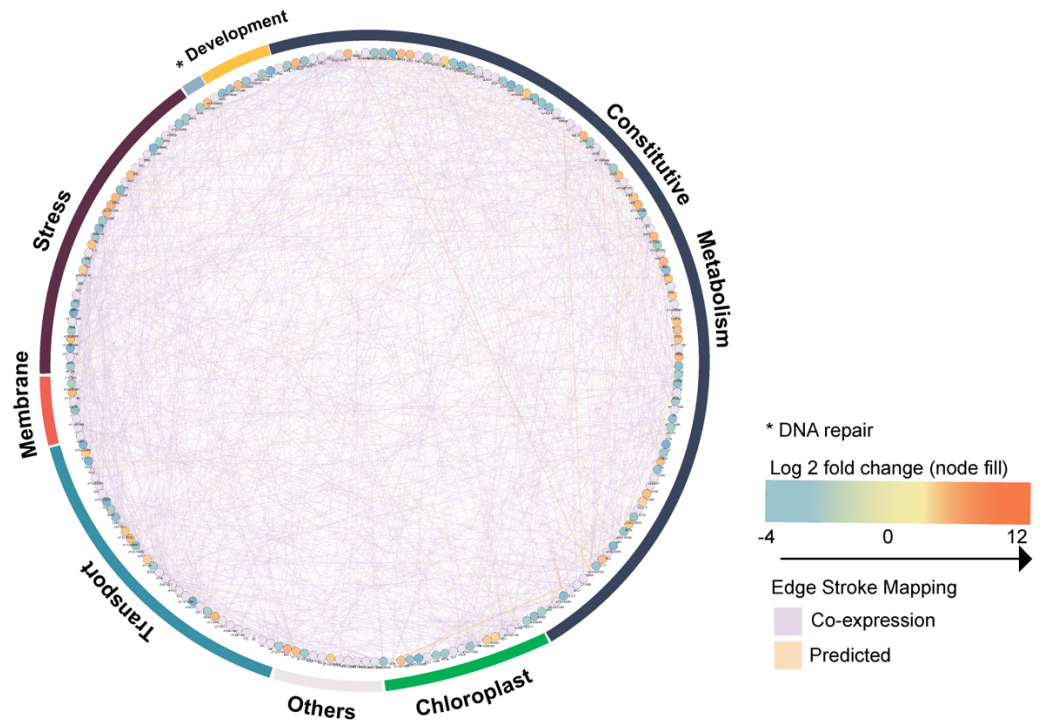

**Figure S4.** Interaction network for *P. albicaulis* gene interaction classification. Up-regulated on orange circles and down-regulated on purple circles in the inoculated samples, dividing genes accordingly to functionality according to KEGG ontology terms. Gray circles interactors genes viewed with GeneMANIA-related genes, crossing lines yielding co-expression interactions (purple), and shared protein domains (teal).

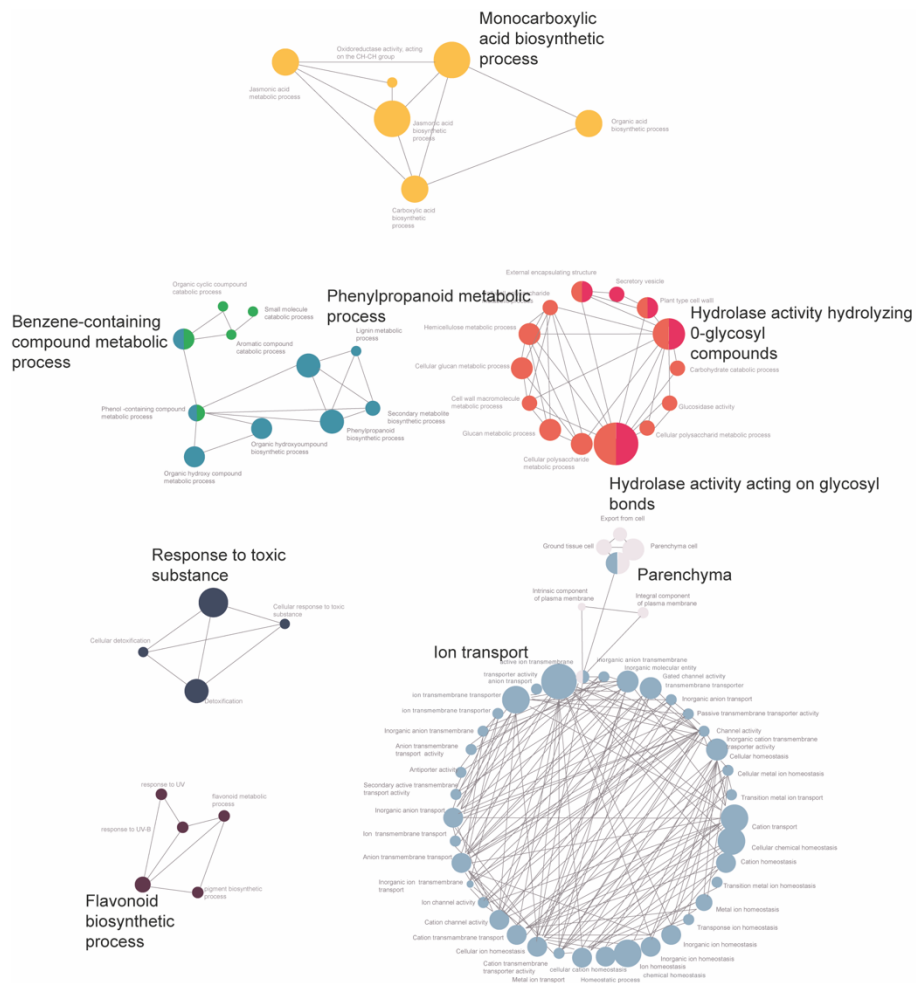

**Figure S5.** Gene interaction based the ortholog classification of DE gene families associated with abiotic response

### Supplementary tables

**Table S1.** Statistics number of reads per sample and aligned to the reference transcriptome for each sample

|                |      | <b>Total<br/>number of<br/>reads<br/>Sequenced<br/>(M)</b> | <b>Total number<br/>of reads<br/>Trimmed<br/>(M)</b> | <b>MAPPED<br/>READS<br/>(%)</b> |
|----------------|------|------------------------------------------------------------|------------------------------------------------------|---------------------------------|
| Inoculated     | 1281 | 21.2                                                       | 21.1                                                 | 71.59                           |
|                | 1282 | 23.5                                                       | 23.4                                                 | 72.65                           |
|                | 1283 | 24                                                         | 23.8                                                 | 68.9                            |
| Non-Inoculated | 1284 | 21.9                                                       | 21.3                                                 | 73.03                           |
|                | 1285 | 24.6                                                       | 24.4                                                 | 71.15                           |
|                | 1286 | 19.7                                                       | 19.5                                                 | 70.79                           |

**Table S2.** Summary statistics for *de novo* assembly

| <b>Assembly TRINITY</b>     | <b>Inoculated</b> |       |       | <b>Non- Inoculated</b> |       |       | <b>Assemble ORP<br/>Merged</b> |
|-----------------------------|-------------------|-------|-------|------------------------|-------|-------|--------------------------------|
|                             | 1281              | 1282  | 1283  | 1284                   | 1285  | 1286  |                                |
| Transcripts                 | 39112             | 40849 | 39405 | 34763                  | 43704 | 40301 | 139837                         |
| N50                         | 2605              | 1297  | 2759  | 505                    | 1682  | 2908  | 2882                           |
| Transcripts (after usearch) | 45594             | 47635 | 44799 | 39359                  | 52025 | 44891 | 86369                          |
| N50                         | 2250              | 321   | 498   | 939                    | 1764  | 774   | 726                            |
| <b>BUSCOs (%)</b>           |                   |       |       |                        |       |       |                                |
| Complete                    | 60.40             | 73.60 | 61.70 | 59.70                  | 79.10 | 60.90 | 88.50                          |
| Single-copy                 | 39.50             | 49.40 | 41.50 | 42.20                  | 50.70 | 38.50 | 46.60                          |
| Duplicated                  | 20.90             | 24.20 | 20.20 | 17.50                  | 28.40 | 22.40 | 41.90                          |
| Fragmented                  | 12.40             | 8.70  | 12.60 | 12.70                  | 6.40  | 12.30 | 2.90                           |
| Missing                     | 27.20             | 17.70 | 25.70 | 27.60                  | 14.50 | 26.80 | 8.60                           |

| <b>Table S3.</b> Contaminants detected based on similarly search annotation |                                                                                                                                                                                                       |                                                                                                                                                                                                  |                                                                                                                                                                                          |                                                                                                                                                                                             |                                                                                                                                                                                                |                                                                                                                                                                                   |
|-----------------------------------------------------------------------------|-------------------------------------------------------------------------------------------------------------------------------------------------------------------------------------------------------|--------------------------------------------------------------------------------------------------------------------------------------------------------------------------------------------------|------------------------------------------------------------------------------------------------------------------------------------------------------------------------------------------|---------------------------------------------------------------------------------------------------------------------------------------------------------------------------------------------|------------------------------------------------------------------------------------------------------------------------------------------------------------------------------------------------|-----------------------------------------------------------------------------------------------------------------------------------------------------------------------------------|
|                                                                             | Inoculated                                                                                                                                                                                            |                                                                                                                                                                                                  |                                                                                                                                                                                          | Non-inoculated                                                                                                                                                                              |                                                                                                                                                                                                |                                                                                                                                                                                   |
| Individual                                                                  | 1281                                                                                                                                                                                                  | 1282                                                                                                                                                                                             | 1283                                                                                                                                                                                     | 1284                                                                                                                                                                                        | 1285                                                                                                                                                                                           | 1286                                                                                                                                                                              |
| Total unique contaminants:                                                  | 149<br>(0.94)                                                                                                                                                                                         | 130<br>(0.86)                                                                                                                                                                                    | 109<br>(0.75)                                                                                                                                                                            | 110<br>(0.81)                                                                                                                                                                               | 94<br>(0.58)                                                                                                                                                                                   | 136(0.97)                                                                                                                                                                         |
| Bacteria                                                                    | 2<br>(1.34)                                                                                                                                                                                           | 3<br>(2.31)                                                                                                                                                                                      | 2<br>(1.83)                                                                                                                                                                              | 1<br>(0.91)                                                                                                                                                                                 | 0                                                                                                                                                                                              | 1<br>(0.74)                                                                                                                                                                       |
| Insecta                                                                     | 70<br>(46.98)                                                                                                                                                                                         | 48<br>(36.92)                                                                                                                                                                                    | 57<br>(52.29)                                                                                                                                                                            | 61<br>(55.45)                                                                                                                                                                               | 44<br>(46.81)                                                                                                                                                                                  | 80<br>(58.82)                                                                                                                                                                     |
| Fungi                                                                       | 77<br>(51.68)                                                                                                                                                                                         | 79<br>(60.77)                                                                                                                                                                                    | 50<br>(45.87)                                                                                                                                                                            | 48<br>(43.64)                                                                                                                                                                               | 50<br>(53.19)                                                                                                                                                                                  | 55<br>(40.44)                                                                                                                                                                     |
| Top 5 contaminants by species:                                              | <i>Rhodotorula graminis</i> 4(2.68%)<br><i>Acyrtosiphon pisum</i> 4(2.68%)<br><i>Diaphorina citri</i> 3(2.01%)<br><i>Batrachochytrium dendrobatidis</i> 3(2.01%)<br><i>Agilus planipenni</i> 3(2.01%) | <i>Sclerotinia sclerotiorum</i> 7(5.38%)<br><i>Botrytis cinerea</i> (3.85%)<br><i>Acyrtosiphon pisum</i> 3(2.31%)<br><i>Diaphorina citri</i> 3(2.31%)<br><i>Rhizophagus irregularis</i> 3(2.31%) | <i>Diabrotica virgifera</i> 4(3.67%)<br><i>Rhagoletis zephyria</i> 3(2.75%)<br><i>Aphis gossypii</i> 3(2.75%)<br><i>Diaphorina citri</i> 3(2.75%)<br><i>Galleria mellonella</i> 3(2.75%) | <i>Diabrotica virgifera</i> 6(5.45%)<br><i>Diaphorina citri</i> 4(3.64%)<br><i>Spodoptera litura</i> 3(2.73%)<br><i>Galleria mellonella</i> 3(2.73%)<br><i>Aspergillus melleus</i> 3(2.73%) | <i>Nilaparvata lugens</i> 4(4.26%)<br><i>Diaphorina citri</i> 4(4.26%)<br><i>Acyrtosiphon pisum</i> 3(3.19%)<br><i>Homalodisca vitripennis</i> 3(3.19%)<br><i>Galleria mellonella</i> 3(3.19%) | <i>Diabrotica virgifera</i> 5(3.68%)<br><i>Nilaparvata lugens</i> 4(2.94%)<br><i>Pieris rapae</i> 3(2.21%)<br><i>Spodoptera litura</i> 3(2.21%)<br><i>Bemisia tabaci</i> 3(2.21%) |

**Table S4.** Annotation statistics

| EnTAP                                                                   | Inoculated |       |       | Non- Inoculated |       |       | REF   |
|-------------------------------------------------------------------------|------------|-------|-------|-----------------|-------|-------|-------|
|                                                                         | 1281       | 1282  | 1283  | 1284            | 1285  | 1286  |       |
| Total Sequences                                                         | 23926      | 24857 | 23604 | 21969           | 26085 | 23021 | 66233 |
| N50                                                                     | 1218       | 1419  | 408   | 381             | 375   | 1203  | 2217  |
| Similarity Search                                                       | 14404      | 15159 | 14483 | 13545           | 16152 | 14044 | 43180 |
| Total unique sequences with family assignment                           | 18902      | 19387 | 18801 | 17840           | 20444 | 18800 | 56732 |
| Total unique sequences with at least one GO term                        | 16417      | 16579 | 16290 | 15436           | 17328 | 16427 | 48221 |
| Total unique sequences with at least one pathway (KEGG) assignment      | 5243       | 5099  | 5217  | 4928            | 5169  | 5358  | 14165 |
| Total unique sequences annotated (gene family and/or similarity search) | 18917      | 19411 | 18818 | 17854           | 20465 | 18817 | 56796 |

**Table S5.** Transcriptome details of White pine species with transcriptomic evidence of infection of WBPR used in this study

| Assembly TRINITY | <i>P. lambertiana</i> | <i>P. monticola</i> | <i>P. albicaulis</i><br>Reference |
|------------------|-----------------------|---------------------|-----------------------------------|
| Transcripts      | 43194                 | 81294               | 139837                            |
| N50              | 1648                  | 4940                | 2882                              |
| Transcripts2     | 48544                 | 65329               | 86369                             |
| N50              | 699                   | 3846                | 726                               |
| BUSCOs (%)       |                       |                     |                                   |
| Complete         | 60.1                  | 75.2                | 88.50                             |
| Single-copy      | 49.4                  | 58.4                | 46.60                             |
| Duplicated       | 10.7                  | 16.8                | 41.90                             |
| Fragmented       | 12.8                  | 8.7                 | 2.90                              |
| Missing          | 27.1                  | 16.1                | 8.60                              |
